# Supplementary material for: Mixed reality-assisted versus landmark-guided spinal puncture in elderly patients: protocol for a stratified randomized controlled trial
Source: PubMed Central journal article supplement — Trials. 2024 Nov 19;25:780. doi: 10.1186/s13063-024-08628-2 (PMC11575154; doi:10.1186/s13063-024-08628-2), 2024-11-19
Supplement: 13063_2024_8628_MOESM4_ESM.pdf [file 13063_2024_8628_MOESM4_ESM.pdf]

伦理审查意见通知函  
Notification Letter

尊敬的 顾卫东 (研究者) 教授:

您提交的“混合现实智能化最佳穿刺路径设计及针轨呈现辅助老年患者腰椎穿刺的研究”临床试验的跟踪审查的相关材料已经复旦大学附属华东医院伦理审查委员会审查, 伦理审查号为 2022K242-G231。审查结果为如下: 同意研究继续进行

主任或副主任委员签名:

复旦大学附属华东医院伦理审查委员会 (HDIRB) (盖章)

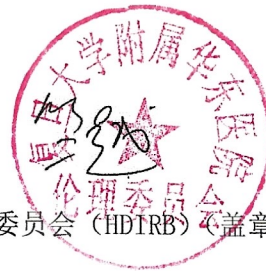

日期: 2023-11-25

华东医院  
复旦大学附属华东医院

Huadong Hospital Affiliated To Fudan University

Certificate

To whom it may concern:

We hereby confirm that Dr. Weidong Gu applied for an ethics review on a clinical trial in September 2022. The title of the trial was a study on the design of optimal puncture path and needle trajectory presentation assisted by mixed reality intelligence for lumbar puncture in elderly patients, which was approved by the Ethics Committee of Huadong Hospital Affiliated to Fudan University on December 1, 2022. Approved Document Number: 20220140. Ethics Committee Project Number: 2022K242. Ethical approval has been applied for and granted for a clinical trial extension, valid until December 31, 2024.

Best regards

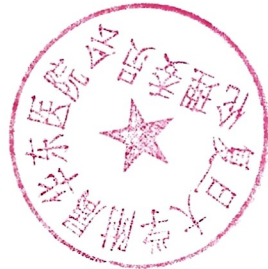

Yue Zhu

Chairman

Ethics Committee of Huadong Hospital Affiliated to Fudan University

August 9, 2024
